# Supplementary material for: Impact of the COVID-19 Outbreak—Delayed Referral of Colorectal and Lung Cancer in Primary Care: A National Retrospective Cohort Study
Source: Cancers (Basel). 2023 Feb 25;15(5):1462. doi: 10.3390/cancers15051462 (PMC10000463; doi:10.3390/cancers15051462)
Supplement: Supplementary file 1 [file cancers-15-01462-s001.zip › cancers-2218372-supplementary.pdf]

# Impact of the COVID-19 Outbreak—Delayed Referral of Colorectal and Lung Cancer in Primary Care: a National Retrospective Cohort Study

## Supplementary materials

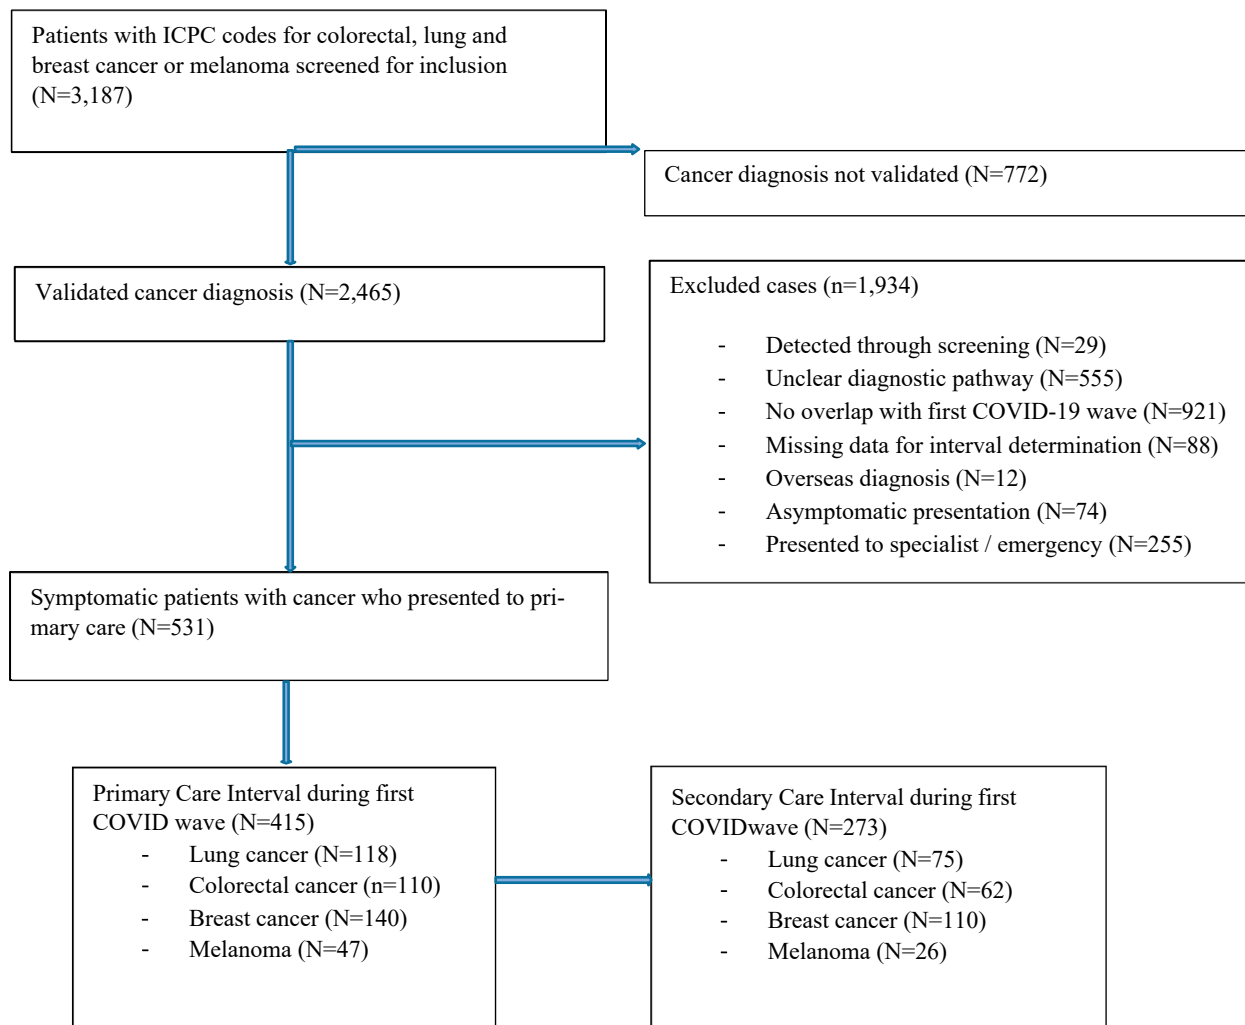

**Supplementary flow diagram (Scheme S1)**– Patient inclusion for patients diagnosed with cancer during first COVID-19 wave

**Supplementary Table S1.** Duration of the Secondary Care Interval (ISC); time between GP referral and histological diagnosis, before- and during the first COVID-19 wave for colorectal-, lung-, breast cancer and melanoma.

| Colorectal cancer                     |              |                  |            |                    |                  |
|---------------------------------------|--------------|------------------|------------|--------------------|------------------|
|                                       | Pre-COVID-19 |                  | COVID-19   |                    |                  |
|                                       | N            | Median (IQR)     | N          | Median (IQR)       | P for change     |
| <b>Total</b>                          | <b>259</b>   | <b>19 (8-35)</b> | <b>62</b>  | <b>17.5 (9-52)</b> | <b>0.377</b>     |
| <b>Gender</b>                         |              |                  |            |                    |                  |
| Male                                  | 129          | 19 (9.5-33.5)    | 29         | 16 (9-54)          | 0.570            |
| Female                                | 130          | 19 (7-36)        | 33         | 18 (9.5-50)        | 0.515            |
| <b>Age</b>                            |              |                  |            |                    |                  |
| <65                                   | 85           | 16 (8-44.5)      | 22         | 19.5 (11-52)       | 0.365            |
| ≥65                                   | 174          | 19 (8-33)        | 39         | 17 (8-67)          | 0.802            |
| <b>Comorbidity *</b>                  |              |                  |            |                    |                  |
| <2                                    | 50           | 18.5 (8-38)      | 19         | 25 (13-58)         | 0.173            |
| More than 2                           | 207          | 19 (8-34)        | 43         | 16 (8-35)          | 0.998            |
| <b>Psychiatric comorbidity</b>        |              |                  |            |                    |                  |
| Yes                                   | 66           | 15 (6-34)        | 13         | 18 (6-68)          | 0.801            |
| no                                    | 190          | 19 (9-35)        | 49         | 17 (10-48.5)       | 0.535            |
| <b>Alarm symptom at first consult</b> |              |                  |            |                    |                  |
| Yes                                   | 147          | 20 (10-38)       | 21         | 25 (8-52.5)        | 0.829            |
| No                                    | 112          | 15 (7-30)        | 41         | 17 (10-46)         | 0.152            |
| <b>Number consults in year prior</b>  |              |                  |            |                    |                  |
| 5 or more                             | 103          | 19 (8-34)        | 32         | 30 (10-75)         | 0.055            |
| Less than 5                           | 86           | 14 (8-36.5)      | 30         | 15.5 (9-25)        | 0.815            |
| Lung cancer                           |              |                  |            |                    |                  |
|                                       | Pre-COVID-19 |                  | COVID-19   |                    |                  |
|                                       | N            | Median (IQR)     | N          | Median (IQR)       | P for change     |
| <b>Total</b>                          | <b>197</b>   | <b>18 (8-35)</b> | <b>75</b>  | <b>18 (7-40)</b>   | <b>0.978</b>     |
| <b>Gender</b>                         |              |                  |            |                    |                  |
| Male                                  | 110          | 18.5 (8-34)      | 33         | 16 (7-45)          | 0.854            |
| Female                                | 87           | 17 (9-36)        | 42         | 18.5 (7-36)        | 0.964            |
| <b>Age</b>                            |              |                  |            |                    |                  |
| <65                                   | 69           | 18 (9-32.5)      | 30         | 19 (7-40)          | 0.656            |
| ≥65                                   | 128          | 17 (8-35)        | 45         | 16 (6-40)          | 0.687            |
| <b>Comorbidity *</b>                  |              |                  |            |                    |                  |
| Less than 2                           | 45           | 15 (7-33)        | 18         | 13.5 (7-20)        | 0.488            |
| 2 or more                             | 149          | 18 (8-35)        | 47         | 23 (7-42)          | 0.445            |
| <b>Psychiatric comorbidity</b>        |              |                  |            |                    |                  |
| Yes                                   | 40           | 16 (8.25-30.5)   | 14         | 40 (14-48.5)       | 0.042            |
| no                                    | 154          | 18 (8-35)        | 61         | 16 (7-31)          | 0.415            |
| <b>Alarm symptom at first consult</b> |              |                  |            |                    |                  |
| Yes                                   | 43           | 16 (8-31)        | 13         | 18 (6.5-43.5)      | 0.560            |
| No                                    | 154          | 18.5 (8-36)      | 62         | 17.5 (7-40)        | 0.837            |
| <b>Number consults in year prior</b>  |              |                  |            |                    |                  |
| 5 or more                             | 100          | 17.5 (8-36)      | 50         | 24 (11-45)         | 0.351            |
| Less than 5                           | 57           | 17 (7-36)        | 25         | 15 (6-23)          | 0.238            |
| Breast cancer                         |              |                  |            |                    |                  |
|                                       | Pre-COVID-19 |                  | COVID-19   |                    |                  |
|                                       | N            | Median (IQR)     | N          | Median (IQR)       | P for change     |
| <b>Total</b>                          | <b>256</b>   | <b>3 (2-7)</b>   | <b>110</b> | <b>6 (3-9)</b>     | <b>&lt;0.001</b> |
| <b>Age</b>                            |              |                  |            |                    |                  |

|                                       |            |                     |                 |                         |                     |
|---------------------------------------|------------|---------------------|-----------------|-------------------------|---------------------|
| <65                                   | 162        | 3 (2-6)             | 68              | 6 (3-9)                 | <0.001              |
| >=65                                  | 94         | 4 (2-7)             | 42              | 5 (2-8)                 | 0.309               |
| <b>Comorbidity *</b>                  |            |                     |                 |                         |                     |
| <2                                    | 125        | 3 (2-7)             | 59              | 5 (3-9)                 | 0.040               |
| More than 2                           | 131        | 3 (2-7)             | 51              | 6 (4-9)                 | 0.000               |
| <b>Psychiatric comorbidity</b>        |            |                     |                 |                         |                     |
| Yes                                   | 44         | 3 (2-7)             | 32              | 6 (3-9)                 | 0.012               |
| no                                    | 210        | 3 (2-7)             | 78              | 5.5 (3-9)               | <0.001              |
| <b>Alarm symptom at first consult</b> |            |                     |                 |                         |                     |
| Yes                                   | 243        | 3 (2-7)             | 97              | 5 (3-8.5)               | <0.001              |
| No                                    | 13         | 6 (2.5-20)          | 13              | 8 (6-32.5)              | 0.257               |
| <b>Number consults in year prior</b>  |            |                     |                 |                         |                     |
| 5 or more                             | 88         | 3 (2-7)             | 64              | 5.5 (3-8)               | 0.013               |
| Less than 5                           | 117        | 3 (2-7)             | 46              | 6 (3-10.5)              | <0.001              |
| <b>Melanoma</b>                       |            |                     |                 |                         |                     |
| <b>Pre-COVID-19</b>                   |            |                     | <b>COVID-19</b> |                         |                     |
|                                       | <b>N</b>   | <b>Median (IQR)</b> | <b>N</b>        | <b>Median (IQR)</b>     | <b>P for change</b> |
| <b>Total</b>                          | <b>105</b> | <b>14 (7-29)</b>    | <b>26</b>       | <b>9 (3-43.5)</b>       | <b>0.441</b>        |
| <b>Gender</b>                         |            |                     |                 |                         |                     |
| Male                                  | 54         | 12.5 (5-23.5)       | 12              | 9 (2-31)                | 0.549               |
| Female                                | 51         | 15.5 (7-34)         | 14              | 9 (3.5-78.5)            | 0.604               |
| <b>Age</b>                            |            |                     |                 |                         |                     |
| <65                                   | 69         | 14 (5.5-33.5)       | 13              | 11 (3-47)               | 0.869               |
| >=65                                  | 37         | 12 (7.5-21.5)       | 13              | 7 (2.5-66.5)            | 0.319               |
| <b>Comorbidity *</b>                  |            |                     |                 |                         |                     |
| <2                                    | 50         | 14 (4.75-33)        | 15              | 6 (2-22)                | 0.210               |
| More than 2                           | 56         | 12.5 (8-27)         | 11              | 20 (4-99)               | 0.576               |
| <b>Psychiatric comorbidity</b>        |            |                     |                 |                         |                     |
| Yes                                   | 19         | 16 (7-35)           | 2               | 60.5 (IQR <i>n.a.</i> ) | <i>n.a.</i>         |
| no                                    | 87         | 13 (6-28)           | 24              | 6.5 (2-39)              | 0.297               |
| <b>Alarm symptom at first consult</b> |            |                     |                 |                         |                     |
| Yes                                   | 81         | 14 (6-30.5)         | 21              | 7 (2.5-63)              | 0.691               |
| No                                    | 25         | 14 (7-28.5)         | 5               | 11 (3-26)               | 0.290               |
| <b>Number consults in year prior</b>  |            |                     |                 |                         |                     |
| 5 or more                             | 38         | 9 (6-25)            | 14              | 4 (2-34.5)              | 0.211               |
| Less than 5                           | 42         | 13 (5-27)           | 12              | 16 (6-50.5)             | 0.417               |

P. for diff.: P-value for difference in durations pre-COVID-19 and during first COVID-19 wave. No significance testing for differences in COVID-19 impact between subgroups within cancer populations was performed, because of low N. IQR: Interquartile Range. Periods: Pre-COVID-19: 2012-2015 - first COVID-19 wave: March-June 2020. \*Comorbidity was defined in accordance with O'Halloran J, Miller GC, Britt H. Defining chronic conditions for primary care with ICPC-2. Family practice. 2004;21(4):381-6.
